# Supplementary material for: Comprehensive Organ-Specific Profiling of Douglas Fir (Pseudotsuga menziesii) Proteome
Source: MDPI journal article supplement (doi:10.3390/biom13091400), 2023-09-16

**Supporting Information Figure S1.**

Scaled Principal Component Analysis of all the biological replicates of proteomes of Douglas-fir organs with (a) individual plot of the proteomic quantitative analysis and (b) the correlation circle plot associated (proteins are represented by dots). Values for x and y axes are those of PC1 and PC2, respectively.

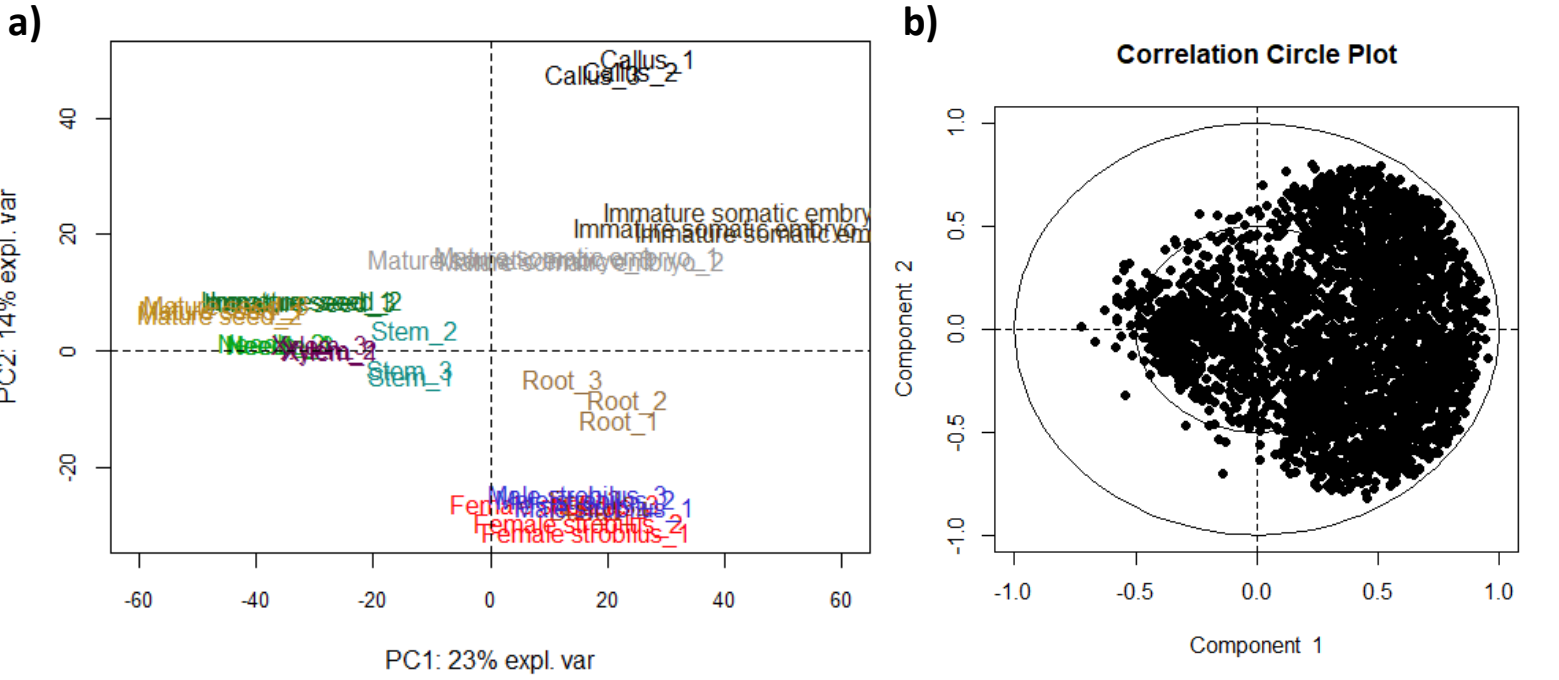

**Supporting Information Figure S2.**

Scaled Principal Component Analysis of the GO abundance of the molecular function of the 12 proteomes of Douglas-fir with (a) the individual plot and (b) the correlation circle plot associated with GO terms. Values for x and y axes are those of PC1 and PC2, respectively.

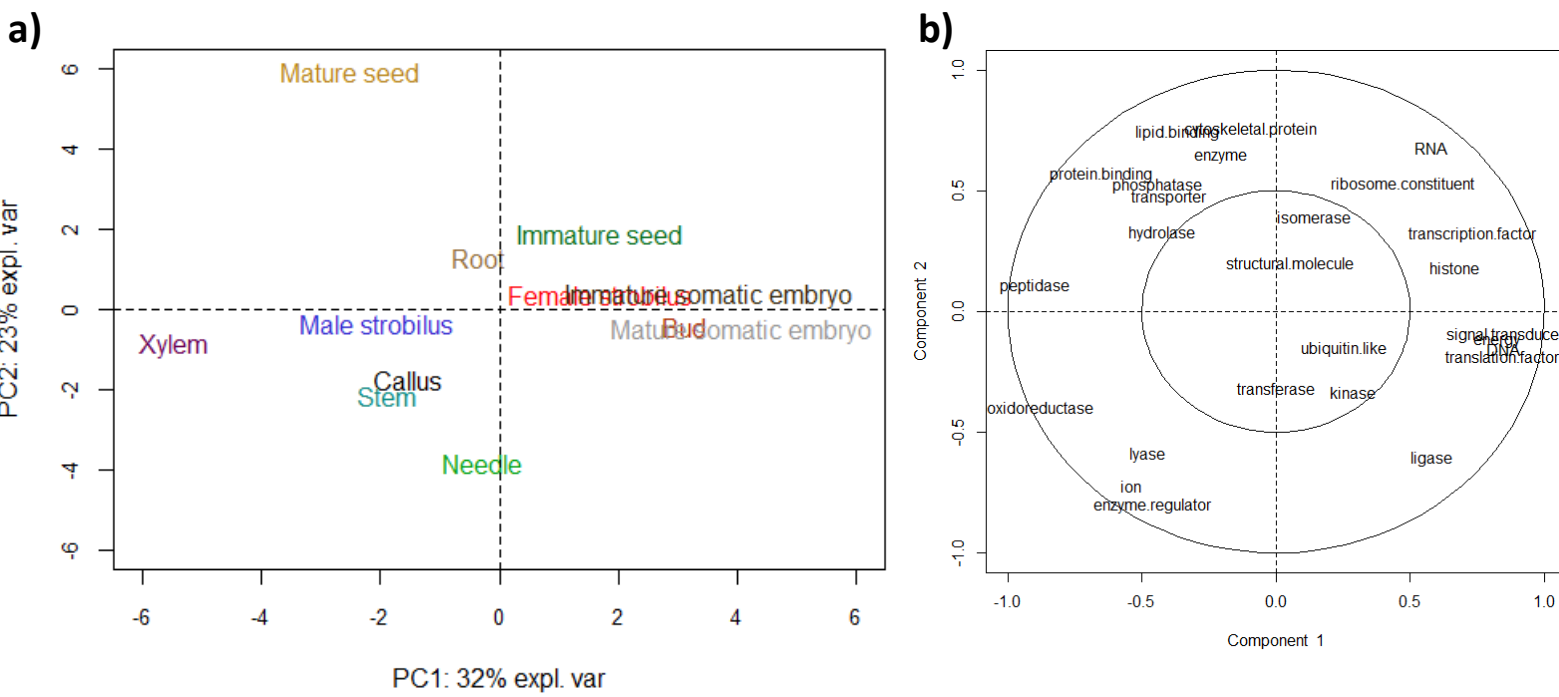

Supplement: s1 [file s1]
